# Supplementary material for: GC Insights: The crystal structures behind the optical properties of minerals – a case study of using TotBlocks in an undergraduate mineralogy lab
Source: Copernicus journal article supplement (doi:10.5194/egusphere-2023-294), 2023-02-27
Supplement: Supplementary file 1 [file egusphere-2023-294-supplement.zip]

Archive with 3 entries (3 files):
- FileS1_totblocks-lab-activity-2022-03-29.pdf
- FileS2_totblocks-questionnaire-2022-03-29.pdf
- FileS3_questionnaire-results.xlsx
