# Supplementary material for: GC Insights: The crystal structures behind the optical properties of minerals – a case study of using TotBlocks in an undergraduate mineralogy lab
Source: Copernicus journal article supplement (doi:10.5194/egusphere-2023-294), 2023-02-27
Supplement: Supplementary file 1 [file egusphere-2023-294-supplement.zip › FileS2_totblocks-questionnaire-2022-03-29.pdf]

## Questionnaire (5 min)

Circle the word that best describes your experience:

I understand the modular relationships between 2:1 phyllosilicates, pyroxenes, and amphiboles **better/worse/the same** as before completing this lab.

I understand pleochroism **better/worse/the same** as before completing this lab.

I understand cleavage **better/worse/the same** as before completing this lab.

I understand extinction angles **better/worse/the same** as before completing this lab.

### Free response questions:

What was your experience of building crystal structures with TotBlocks like (e.g., were the instructions clear?)

Things in this lab that went well:

Things in this lab that were confusing:

Additional comments:
