# Supplementary material for: GC Insights: The crystal structures behind the optical properties of minerals – a case study of using TotBlocks in an undergraduate mineralogy lab
Source: Copernicus journal article supplement (doi:10.5194/egusphere-2023-294), 2023-02-27
Supplement: Supplementary file 1 [file FileS3_questionnaire-results.xlsx]

## Sheet: Sheet1
Questionnaire No.	Metric	Modular relationships (better/worse/same)	Pleochroism (better/worse/same)	Cleavage (better/worse/same)	Exctinction angles (better/worse/same)	Free response	What was your experience of building crystal structures with TotBlocks like (e.g., were the instructions clear?)	Things in this lab that went well:	Things in this lab that were confusing:	Additional comments:
1		better	better	better	better		Instructions were clear and the activity very dynamic.	The fact of having to build the structures as a group of 3-4 people really helped to share concepts and opinions about the questionaire	The assamblage of the structures, but it all makes part of getting to know how the pieces work	No response
2		better	better	better	same		It was confused the 1st time, but it got better building the other supergroups	Now how to build the crystals	Some of the extinctions	No response
3		better	better	better	same		Pretty good, we got stuck on a few areas but then asked questions and it became more clear	Most things	Assembling an amphibole	No response
4		no response	no response	no response	no response		Yes	-Understanding pleochroism and why it occurs -As well as cleavage	-Building the amphibole model	No response
5		better	same	better	same		May be easier w/ number stickers on module but overall not hard to understand	-Paralleling real-life structures into models easy to understand	How the blocks connected b/w ok pegs	Very cool idea!
6		better	same	better	better		Instructions were clear, building went well. Visual diagrams helped	Presentation was well, blocks helped in understanding	No response	Nicely put together
7		better	better	better	better		It was clear	The presentation	Putting the amphibole together	Everything was good & well
8		better	better	better	better		Instructions were clear. Block models helpful.	Pleochroism + cleavage angles	Extinction	Helpful to add step by step like T to T = amphibole, T to O = pyroxene
9		no response	no response	no response	no response		It was a lot of text, but it was clear.	Instructions from the presenter.	Parallel/perpendicular to. I could just be dumb.	It was good. I really liked working w/ something tangible.
10		better	better	better	better		Instructions were clear, photo instructions went very well	Building & understanding of cleavage	No response	Thanks for the Lego Lab helped a lot with cleavage
11		better	better	better	same		Instructions were clear, photos were very helpful	Building - Different in understanding than just being lectured	Axis locations on crystal structure	Cool spaceships can be built Very fun tbh
12		better	better	better	same		I enjoyed the experience. I think the building of the structures would be easier with step by step image (Ikea furniture)	The visualization of cleavage when breaking blocks.	Building it.	This reminded me of Legos.
13		better	same	same	better		Instructions were a lil confusing but overal it was enjoyable to build	Seeing cleavage and extinction in real life	Construction of blocks	No response
14		better	better	same	better		Instructions were clear… however it would be helpful to have step by step instructions with images	Being able to apply what ahs been learnt in class to a physical aspect e.g. pleochroism/extinction	Trying to figure out how to put the blocks together	No response
15		better	better	same	same		Instructions clear.	Building the blocks went well.	Orientations, visualization.	No response
		Modular mineralogy	Cleavage	Pleochroism	Extinction angles
Better		13	10	10	7
Same		0	3	3	6
Worse		0	0	0	0
No response		2	2	2	2
		1	0.769231	0.769231	0.538462
